# Supplementary material for: Molecular Mechanisms of Bacterial Bioluminescence
Source: PubMed Central journal article supplement — Comput Struct Biotechnol J. 2018 Nov 15;16:551–64. doi: 10.1016/j.csbj.2018.11.003 (PMC6279958; doi:10.1016/j.csbj.2018.11.003), 2018-11-15
Supplement: mmc1.pdf [file mmc1.pdf]

**SUPPORTING INFORMATION  
FOR**

**MOLECULAR MECHANISMS OF BACTERIAL BIOLUMINESCENCE**

*Eveline Brodl, Andreas Winkler and Peter Macheroux\**

Institute of Biochemistry, Graz University of Technology, Graz, Austria

\* Corresponding Author: Peter Macheroux, Institute of Biochemistry, Graz University of Technology. Email: peter.macheroux@tugraz.at.

**This file includes:**

**Supplementary Figure 1**

**Supplementary Table 1**

## A LuxE

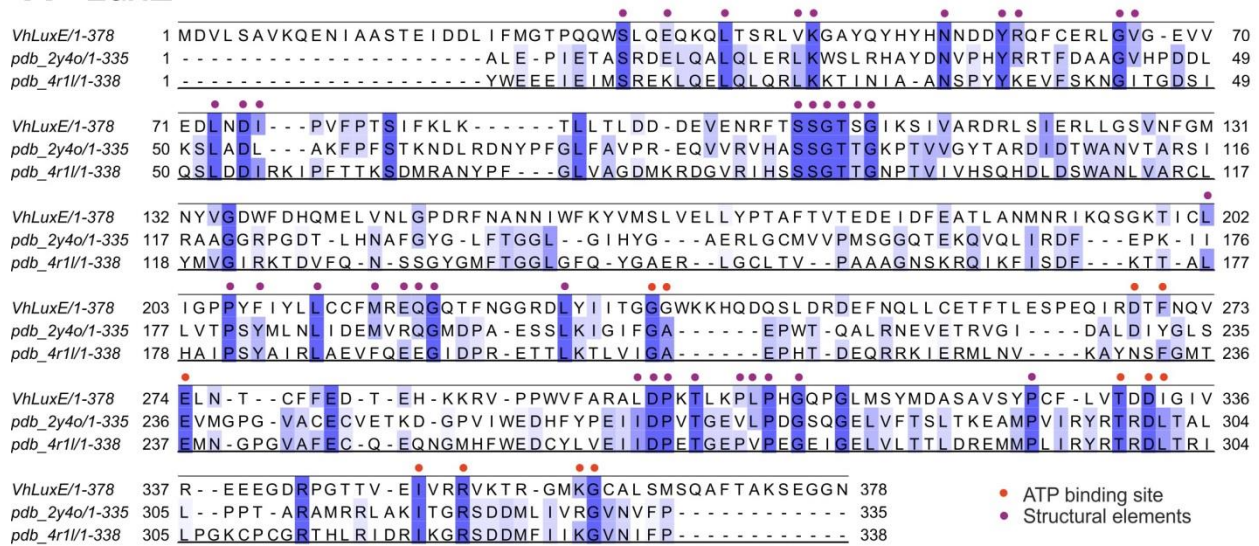

## B LuxC

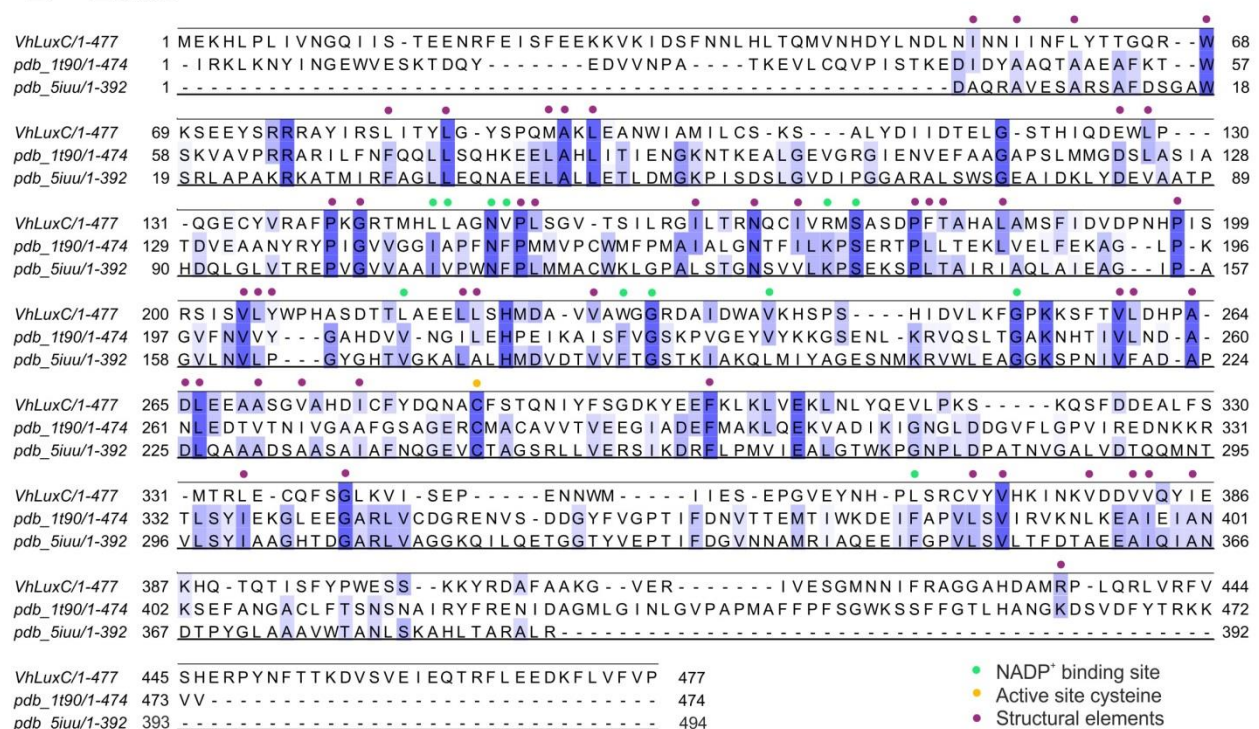

**Supplementary Figure 1:** Sequence alignments of LuxE (panel A) and LuxC (panel B) with two templates each that were used for the generation of homology models using the SWISS-MODEL server [80]. The aligned proteins are LuxE from *V. harveyi* (UniProt identifier B2XS33), phenylacetate-CoA ligase from *Burkholderia cenocepacia* (B4EL89, pdb 2Y4O) and acyl-CoA ligase from *Bacteroides thetaiotaomicron* (Q8AAN6, pdb 4R1L) in panel A as well as LuxC from *V. harveyi* (P08639), methylmalonate semialdehyde dehydrogenase from *Bacillus subtilis* (P42412, pdb 1T90) and apo indole-3-acetaldehyde dehydrogenase from *Pseudomonas syringae* (Q88BC5, pdb 5IUU) in panel B. The alignment was performed by the SWISS-MODEL server after selecting the corresponding models and visualized using Jalview [86]. Conserved regions are highlighted in shades of blue, with darker hues indicating higher conservation. Colored dots

above these regions indicate the primary reason for conservation and are classified according to the legend in each panel to either structurally important elements or functional regions involved in cofactor binding or active site formation.

**Supplementary Table 1:** List of bioluminescent bacterial strains with available *lux* operon sequence

| No  | strain                                                                  | GenBank accession no | available sequence information                                           |
|-----|-------------------------------------------------------------------------|----------------------|--------------------------------------------------------------------------|
| 1   | <i>Photobacterium leiognathi</i> subsp. <i>mandapamensis</i> ATCC 27561 | DQ988878             | <i>luxC</i> * <i>DABFEG</i> , <i>ribEBHA</i> *                           |
| 2a  | <i>Photobacterium mandapamensis</i> ajapo.4.20_copy1                    | EU122285             | <i>luxCDABFEG</i> , <i>ribEBHA</i>                                       |
| 2b  | <i>Photobacterium mandapamensis</i> ajapo.4.20_copy2                    | EU122286             | <i>luxCDABEG</i> , <i>ribEBHA</i>                                        |
| 3   | <i>Photobacterium leiognathi</i> subsp. <i>mandapamensis</i> PL-721     | DQ988877.2           | <i>luxC</i> * <i>DABFEG</i> , <i>ribEBHA</i> *                           |
| 4   | <i>Photobacterium phosphoreum</i> ATCC 11040                            | DQ988873             | <i>luxCDABFEG</i> , <i>ribBHA</i> *                                      |
| 5   | <i>Photobacterium phosphoreum</i> (NBRC 104104)                         | AB367391.1           | <i>luxCDABFEG</i>                                                        |
| 6   | <i>Photobacterium phosphoreum</i> FS-1.1                                | AY849486.2           | <i>luxC</i> * <i>DABFEG</i> , <i>ribB</i>                                |
| 7   | <i>Photobacterium phosphoreum</i> (NBRC 13896)                          | AB104437.1           | <i>luxCDABFEG</i> , <i>lumP</i>                                          |
| 8   | <i>Photobacterium phosphoreum</i>                                       | LC144829.1           | <i>luxCDABFEG</i>                                                        |
| 9   | <i>Photobacterium leiognathi</i> ATCC 25521                             | M63594               | <i>luxCDABEG</i>                                                         |
| 10a | <i>Photobacterium leiognathi</i> lelon.2.1_copy1                        | EF536333.1           | <i>luxCDABEG</i> , <i>ribEBHA</i> , <i>lumQ</i>                          |
| 10b | <i>Photobacterium leiognathi</i> lelon.2.1_copy2                        | EF536334.1           | <i>luxC</i> * <i>DABEG</i> , <i>ribEBHA</i>                              |
| 11a | <i>Photobacterium leiognathi</i> lnuch.21.1                             | EF536335.1           | <i>luxCDABEG</i> , <i>ribEBHA</i> , <i>lumQ</i>                          |
| 11b | <i>Photobacterium leiognathi</i> lnuch.21.1                             | EF536336.1           | <i>luxCDABEG</i> , <i>ribEBHA</i>                                        |
| 12  | <i>Photobacterium aquimaris</i> (NBRC 104633)                           | JQ229765.1           | <i>luxCDABFEG</i> , <i>ribEBHA</i> *                                     |
| 13  | <i>Photobacterium aquimaris</i> BS-1                                    | JQ229766.1           | <i>luxCDABFEG</i> , <i>ribEBHA</i> , <i>lumP</i>                         |
| 14  | <i>Photobacterium kishitanii</i> (pjapo.1.1)                            | DQ988874             | <i>luxCDABFEG</i> , <i>ribEBHA</i> *                                     |
| 15  | <i>Photobacterium kishitanii</i> (NCIMB 844)                            | AY341064.2           | <i>luxCDABFEG</i> , <i>ribEB</i>                                         |
| 16  | <i>Photobacterium damsela</i> BT-6                                      | EU122290.1           | <i>luxD</i> * <i>ABE</i>                                                 |
| 17a | <i>Photobacterium</i> lnuch.13.1_copy1                                  | EF536338             | <i>luxCDABEG</i> , <i>ribEBHA</i> , <i>lumQ</i>                          |
| 17b | <i>Photobacterium</i> lnuch.13.1_copy2                                  | EF536332             | <i>luxCDABEG</i> , <i>ribEBHA</i> , <i>lumQ</i>                          |
| 18  | <i>Aliivibrio salmonicida</i>                                           | AF452135             | <i>luxCDABE</i> , <i>luxR</i> , <i>luxI</i> , <i>luxR2</i> , <i>ribG</i> |
| 19  | <i>Aliivibrio salmonicida</i> LFI1238                                   | FM178380.1           | <i>luxCDABEG</i> , <i>luxR</i> , <i>luxI</i>                             |
| 20  | <i>Aliivibrio fischeri</i> ATCC 7744                                    | AY341062.2           | <i>luxC</i> * <i>DABE</i> *                                              |
| 21  | <i>Aliivibrio fischeri</i> MJ-1                                         | AF170104.1           | <i>luxCDABEG</i> , <i>luxR</i> , <i>luxI</i>                             |
| 22  | <i>Aliivibrio fischeri</i> MJ11                                         | CP001133.1           | <i>luxCDABEG</i> , <i>luxR</i> , <i>lux</i> , <i>ribG</i>                |
| 23  | <i>Aliivibrio logei</i> KCh1                                            | HQ450520.1           | <i>luxCDABE</i> , <i>luxR</i> , <i>luxI</i> , <i>luxR2</i>               |
| 24  | <i>Vibrio vulnificus</i> VVL1 ATCC 43382                                | EU122289             | <i>luxC</i> * <i>DABEG</i>                                               |
| 25  | <i>Vibrio orientalis</i> ATCC 33934                                     | EU556495.1           | <i>luxCDABEG</i> , <i>luxH</i>                                           |
| 26  | <i>Vibrio albensis</i> (NCIMB 41)                                       | AB115761             | <i>luxCDABEG</i>                                                         |
| 27  | <i>Vibrio harveyi</i> ATCC 14126                                        | EU122288             | <i>luxCDABEG</i> , <i>ribB</i> *                                         |
| 28  | <i>Vibrio harveyi</i> BCB440                                            | EU192082.1           | <i>luxCDABEG</i> , <i>luxH</i>                                           |
| 29  | <i>Vibrio harveyi</i> ATCC 33843                                        | CP009468.1           | <i>luxCDABEG</i>                                                         |
| 30  | <i>Vibrio chagasii</i> 21N-12                                           | EU122293.1           | <i>luxD</i> * <i>ABE</i> *                                               |
| 31  | <i>Vibrio chagasii</i> SB-52                                            | EU122294.1           | <i>luxD</i> * <i>ABE</i> *                                               |
| 32  | <i>Vibrio campbellii</i> ATCC BAA-1116_1                                | CP006606.1           | <i>luxCDABEG</i> , <i>luxH</i>                                           |
| 33  | <i>Vibrio campbellii</i> ATCC BAA-1116_2                                | CP000790.1           | <i>luxCDABEG</i> , <i>ribB</i>                                           |
| 34  | <i>Vibrio campbellii</i> LA16-V1                                        | CP021146.1           | <i>luxCDABEG</i>                                                         |
| 35  | <i>Vibrio azureus</i> LC2-005 (NBRC 104587)                             | CP018617.1           | <i>luxCDABEG</i>                                                         |
| 36  | <i>Vibrio</i> sp. BCB494                                                | EU192084.1           | <i>luxC</i> * <i>DABEG</i> , <i>luxH</i>                                 |
| 37  | <i>Photorhabdus luminescens</i> subsp. <i>luminescens</i> ATCC 29999    | M90093.1             | <i>luxCDABE</i>                                                          |
| 38  | <i>Photorhabdus luminescens</i> Hw                                      | M90092.1             | <i>luxCDABE</i>                                                          |
| 39  | <i>Photorhabdus luminescens</i> ZM1                                     | AF403784.1           | <i>luxCDABE</i>                                                          |
| 40  | <i>Photorhabdus luminescens</i> HW                                      | M62917.1             | <i>luxCDABE</i> *                                                        |
| 41  | <i>Photorhabdus luminescens</i> subsp. <i>laumondii</i> TTO1            | BX571866.1           | <i>luxCDABE</i>                                                          |
| 42  | <i>Photorhabdus asymbiotica</i> ATCC 43949                              | FM162591.1           | <i>luxCDABE</i>                                                          |
| 43  | <i>Photorhabdus temperata</i> subsp. <i>thracensis</i> (DSM 15199)      | CP011104.1           | <i>luxCDABE</i>                                                          |
| 44  | <i>Shewanella hanedai</i> ATCC 33224                                    | AB058949             | <i>luxC</i> * <i>DABEG</i>                                               |
| 45  | <i>Shewanella hanedai</i> (NCIMB 2157)                                  | AB261992.1           | <i>luxCDABEG</i> , <i>luxR</i> , <i>luxI</i>                             |
| 46  | <i>Shewanella woodyi</i>                                                | AB368544.1           | <i>luxCDABE</i>                                                          |
| 47  | <i>Shewanella woodyi</i> ATCC 51908                                     | CP000961.1           | <i>luxCDABEG</i>                                                         |
| 48  | <i>Candidatus</i> Photodesmus katoptron (Akat2007.1.1)                  | HQ333499.1           | <i>luxCDABEG</i>                                                         |
| 49  | Bacterium symbiont of <i>Cryptosaras couesii</i>                        | CP020663.1           | <i>luxCDABEG</i>                                                         |

\* Indicates partial sequences.

a, b (in numbering) Indicates two copies of the *lux* operon in the same bacterial strain.
